# Supplementary material
Source: publisher figshare collection journal article supplement (https://acs.figshare.com/ndownloader/files/10307409)

**Analysis of gluten in a wheat gluten incurred sorghum beer  
brewed in the presence of proline endopeptidase  
by LC-MS/MS**

*Katherine L. Fiedler, Rakhi Panda, Timothy R. Croley*

Center for Food Safety and Applied Nutrition, U.S. Food and Drug Administration  
5001 Campus Drive, College Park, Maryland 20740, United States

**Supporting Information**

Please see Excel file for Supplementary Table 1. Gluten peptides identified in three out of the four brew replicates of the 200 mg/L wheat gluten incurred sorghum beer for the non-PEP containing beer and beer brewed with the standard dose of PEP (34  $\mu$ L PEP/L wort), as shown in Figure 1.

Please see Excel file for Supplementary Table 2. Gluten peptides identified in both brew replicates 3 and 4 of the 200 mg/L wheat gluten incurred sorghum beer with their associated gluten protein class for the non-PEP containing beer and beer brewed with either the standard or high dose of PEP, as shown in Figure 4.

Supplementary Table 3. The proline content of each wheat gluten protein class and the average number of peptides (>9 amino acids long) that would be generated from a complete *in silico* digestion with PEP. All UniProt entries for *T. aestivum* (downloaded on 04-04-2017) were filtered according to the following minimum molecular weights, so only full-length sequences were used for the *in silico* digestion: >30 kDa for  $\alpha$ -,  $\gamma$ -, and  $\omega$ -gliadins, >28 kDa for LMW-glutenins, and >70 kDa for HMW-glutenins.

| Gluten Protein Class | % Pro | Average # peptides from <i>in silico</i> digest with PEP |
|----------------------|-------|----------------------------------------------------------|
| alpha-gliadin        | 15    | 7                                                        |
| gamma-gliadin        | 17    | 9                                                        |
| LMW-glutenin         | 13    | 11                                                       |
| omega-gliadin        | 22    | 4                                                        |
| HMW-glutenin         | 11    | 37                                                       |

Please see Excel file for Supplementary Table 4. Database of 465 known immunogenic sequences with their associated gluten protein class.

Please see Excel file for Supplementary Table 5. Gluten peptides identified in the four non-PEP containing commercial wheat beers with their associated gluten protein class, as shown in Supplementary Figure 7.

Supplementary Table 6. Number of chymotryptic and hydrolyzed HMW-glutenin peptides identified in the non-PEP containing 200 mg/L wheat gluten incurred sorghum beer and non-PEP containing commercial wheat beers.

|                     | <b>No PEP</b> | <b>Comm 1</b> | <b>Comm 2</b> | <b>Comm 3</b> | <b>Comm 4</b> |
|---------------------|---------------|---------------|---------------|---------------|---------------|
| <b>Chymotryptic</b> | 17            | 32            | 67            | 111           | 3             |
| <b>Hydrolyzed</b>   | 0             | 46            | 75            | 112           | 87            |

Supplementary Figure 1. PD 2.1 parameters used for data analysis.

## Processing Workflow

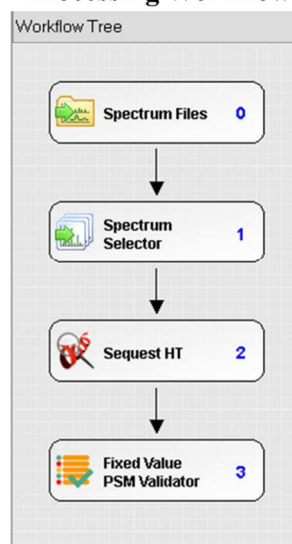

## Processing Node 1

|                                                    |                   |
|----------------------------------------------------|-------------------|
| <b>1. General Settings</b>                         |                   |
| Precursor Selection                                | Use MS1 Precursor |
| Use New Precursor Reevaluation                     | True              |
| Use Isotope Pattern in Precursor Reevaluation      | True              |
| <b>2. Spectrum Properties Filter</b>               |                   |
| Lower RT Limit                                     | 0                 |
| Upper RT Limit                                     | 0                 |
| First Scan                                         | 0                 |
| Last Scan                                          | 0                 |
| Ignore Specified Scans                             |                   |
| Lowest Charge State                                | 0                 |
| Highest Charge State                               | 0                 |
| Min. Precursor Mass                                | 350 Da            |
| Max. Precursor Mass                                | 10000 Da          |
| Total Intensity Threshold                          | 0                 |
| Minimum Peak Count                                 | 1                 |
| <b>3. Scan Event Filters</b>                       |                   |
| Mass Analyzer                                      | (Not specified)   |
| MS Order                                           | Is MS2            |
| Activation Type                                    | Is HCD            |
| Min. Collision Energy                              | 0                 |
| Max. Collision Energy                              | 1000              |
| Scan Type                                          | Is Full           |
| Polarity Mode                                      | (Not specified)   |
| <b>4. Peak Filters</b>                             |                   |
| S/N Threshold (FT-only)                            | 1.5               |
| <b>5. Replacements for Unrecognized Properties</b> |                   |
| Unrecognized Charge Replacements                   | Automatic         |
| Unrecognized Mass Analyzer Replacements            | ITMS              |
| Unrecognized MS Order Replacements                 | MS2               |
| Unrecognized Activation Type Replacements          | CID               |
| Unrecognized Polarity Replacements                 | +                 |
| Unrecognized MS Resolution@200 Replacements        | 60000             |
| Unrecognized MSn Resolution@200 Replacements       | 30000             |
| <b>6. Precursor Pattern Extraction</b>             |                   |
| Precursor Clipping Range Before                    | 2.5 Da            |
| Precursor Clipping Range After                     | 5.5 Da            |

## Processing Node 2

|                                             |                         |
|---------------------------------------------|-------------------------|
| 1. Input Data                               |                         |
| Protein Database                            | uniprot_RakhiBeer.fasta |
| Enzyme Name                                 | No-Enzyme (Unspecific)  |
| Max. Missed Cleavage Sites                  | 0                       |
| Min. Peptide Length                         | 6                       |
| Max. Peptide Length                         | 144                     |
| Max. Number of Peptides Reported            | 10                      |
| 2. Tolerances                               |                         |
| Precursor Mass Tolerance                    | 10 ppm                  |
| Fragment Mass Tolerance                     | 0.03 Da                 |
| Use Average Precursor Mass                  | False                   |
| Use Average Fragment Mass                   | False                   |
| 3. Spectrum Matching                        |                         |
| Use Neutral Loss a Ions                     | True                    |
| Use Neutral Loss b Ions                     | True                    |
| Use Neutral Loss y Ions                     | True                    |
| Use Flanking Ions                           | True                    |
| Weight of a Ions                            | 0                       |
| Weight of b Ions                            | 1                       |
| Weight of c Ions                            | 0                       |
| Weight of x Ions                            | 0                       |
| Weight of y Ions                            | 1                       |
| Weight of z Ions                            | 0                       |
| 4. Dynamic Modifications                    |                         |
| 5. Dynamic Modifications (peptide terminus) |                         |
| 6. Dynamic Modifications (protein terminus) |                         |
| 7. Static Modifications                     |                         |

For digested samples only:

|                         |                                  |
|-------------------------|----------------------------------|
| 7. Static Modifications |                                  |
| Peptide N-Terminus      | None                             |
| Peptide C-Terminus      | None                             |
| 1. Static Modification  | Carbamidomethyl / +57.021 Da (C) |
| 2. Static Modification  | None                             |
| 3. Static Modification  | None                             |
| 4. Static Modification  | None                             |
| 5. Static Modification  | None                             |
| 6. Static Modification  | None                             |

## Processing Node 3

|                  |   |
|------------------|---|
| 1. Input Data    |   |
| Maximum Delta Cn | 1 |
| Maximum Rank     | 0 |

## Consensus Workflow

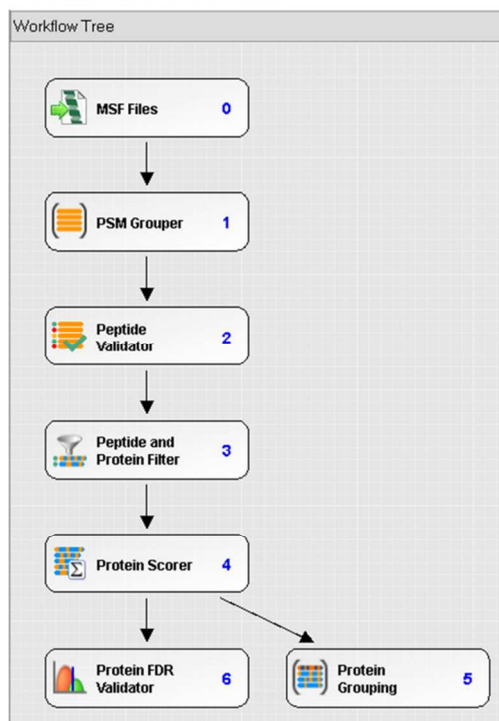

## Consensus Node 0

|                                               |                                |
|-----------------------------------------------|--------------------------------|
| 1. Spectrum Storage Settings                  |                                |
| Spectra to Store                              | Identified or Quantified       |
| 2. Merging of Identified Peptide and Proteins |                                |
| Merge Mode                                    | Globally by Search Engine Type |
| File Limit for Automatic Merge.               | 10                             |
| 3. FASTA Title Line Display                   |                                |
| Reported FASTA Title Lines                    | Best match                     |
| Title Line Rule                               | standard                       |
| Preferred Accession                           |                                |
| Preferred Taxonomy                            |                                |
| Avoid Expressions                             |                                |
| 4. PSM Filters                                |                                |
| Maximum Delta Cn                              | 0.05                           |
| Maximum Rank                                  | 0                              |
| Maximum Delta Mass                            | 0 ppm                          |
| 1. Score                                      |                                |
| 1. Threshold                                  | 0                              |
| 2. Score                                      |                                |
| 2. Threshold                                  | 0                              |
| 3. Score                                      |                                |
| 3. Threshold                                  | 0                              |
| 4. Score                                      |                                |
| 4. Threshold                                  | 0                              |
| 5. Score                                      |                                |
| 5. Threshold                                  | 0                              |
| 6. Score                                      |                                |
| 6. Threshold                                  | 0                              |
| 7. Score                                      |                                |
| 7. Threshold                                  | 0                              |
| 8. Score                                      |                                |
| 8. Threshold                                  | 0                              |
| 9. Score                                      |                                |
| 9. Threshold                                  | 0                              |
| 10. Score                                     |                                |
| 10. Threshold                                 | 0                              |

## Consensus Node 1

|                                |               |
|--------------------------------|---------------|
| 1. Peptide Group Modifications |               |
| Site Probability Threshold     | 75            |
| 2. Display Options             |               |
| Modification Sites Shown       | Best Position |

## Consensus Node 2

|                                                                               |                                               |
|-------------------------------------------------------------------------------|-----------------------------------------------|
| 1. General Validation Settings                                                |                                               |
| Validation Mode                                                               | Only PSM level FDR Calculation based on score |
| Target FDR (Strict) for PSMs                                                  | 0.01                                          |
| Target FDR (Relaxed) for PSMs                                                 | 0.05                                          |
| Target FDR (Strict) for Peptides                                              | 0.01                                          |
| Target FDR (Relaxed) for Peptides                                             | 0.05                                          |
| 2. Specific Validator Settings                                                |                                               |
| Validation Based on                                                           | q-Value                                       |
| Use Concatenated FDR Calculation for PSM Level FDR Calculation Based on Score | False                                         |
| Reset Confidences for Nodes without Decoy Search (Fixed score thresholds)     | False                                         |

## Consensus Node 3

|                                            |       |
|--------------------------------------------|-------|
| 1. Peptide Filters                         |       |
| Peptide Confidence At Least                | High  |
| Keep Lower Confident PSMs                  | False |
| Minimum Peptide Length                     | 6     |
| Remove Peptides Without Protein Reference  | False |
| 2. Protein Filters                         |       |
| Minimum Number of Peptide Sequences        | 1     |
| Count Only Rank 1 Peptides                 | True  |
| Count Peptides Only for Top Scored Protein | False |

## Consensus Node 5

|                                  |      |
|----------------------------------|------|
| 1. Protein Grouping              |      |
| Apply strict parsimony principle | True |

## Consensus Node 6

|                          |      |
|--------------------------|------|
| 1. Confidence Thresholds |      |
| Target FDR (Strict)      | 0.01 |
| Target FDR (Relaxed)     | 0.05 |

Supplementary Figure 2. Total number of gluten peptides identified in each brew replicate 1-4 of the 200 mg/L wheat gluten incurred sorghum beer for the non-PEP containing beer (A) and beer brewed with the standard dose of PEP (34  $\mu$ L PEP/L wort) (B).

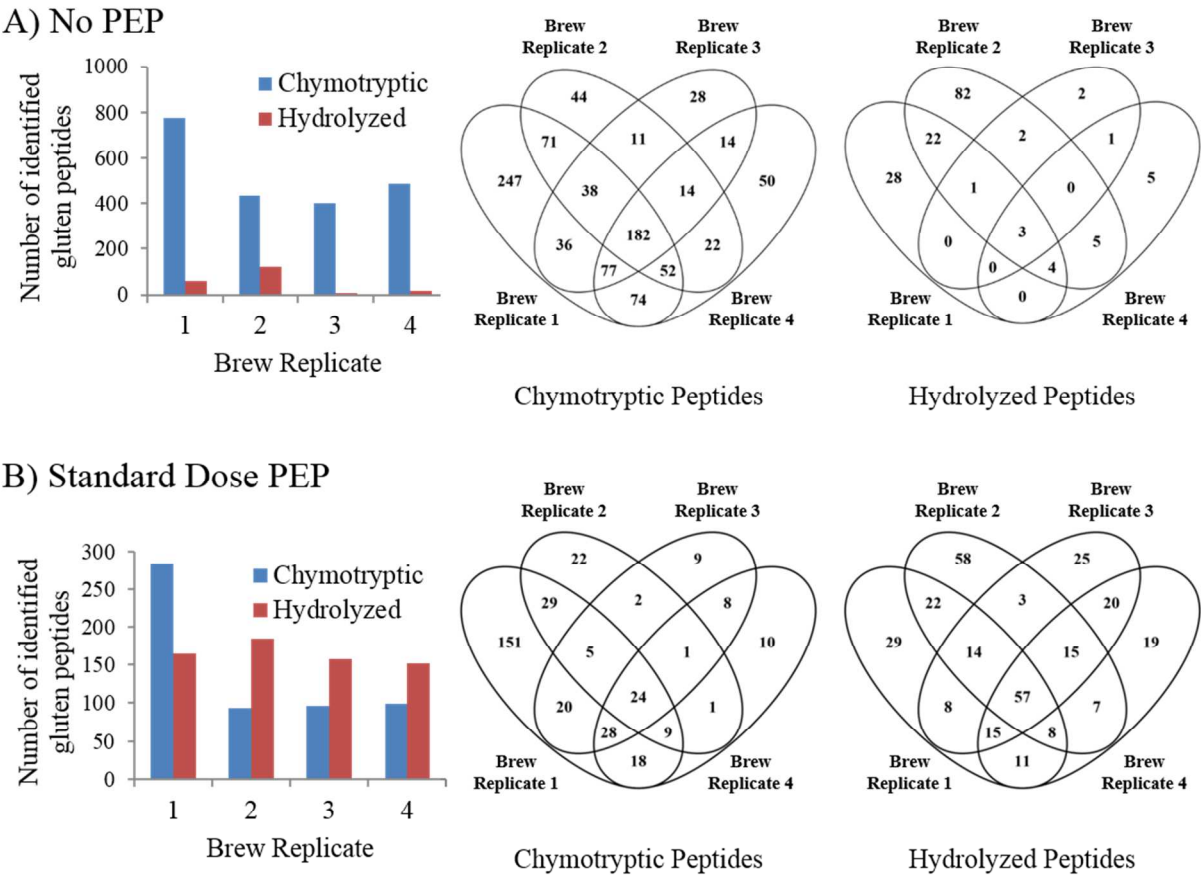



Supplementary Figure 3. A plot of the C-terminal amino acid for each chymotryptic gluten peptide (A) and hydrolyzed gluten peptide (B) from Figure 1, which shows the cleavage specificity observed for fermentation alone in the non-PEP containing beer and fermentation and PEP treatment in the beer brewed with the standard dose of PEP.

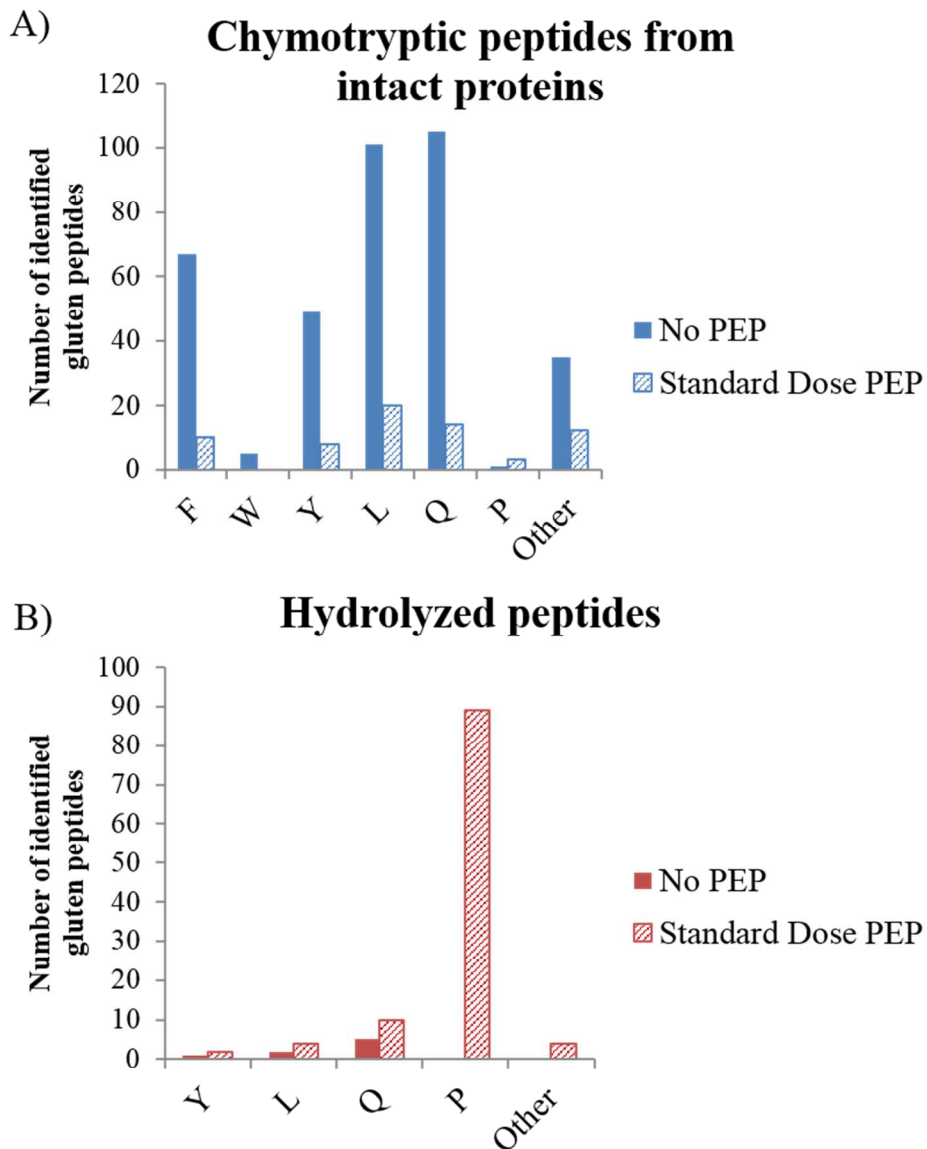

Supplementary Figure 4. The number of internal proline residues per peptide identified in the 200 mg/L wheat gluten incurred sorghum beer for the non-PEP containing beer (A) and beer brewed with the standard dose of PEP (B), as shown in Figure 1.

A) No PEP

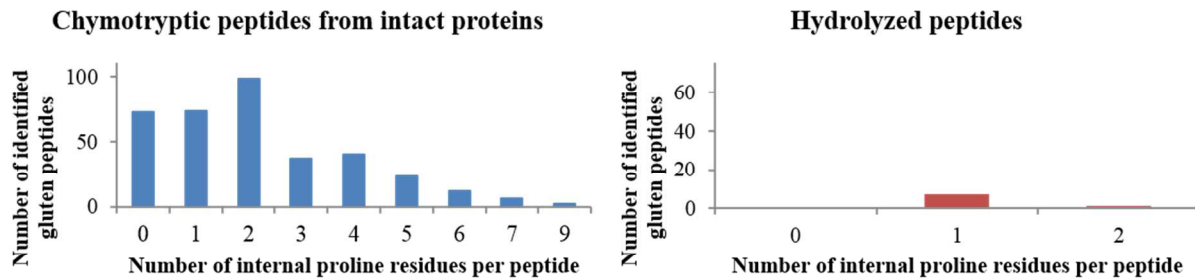

B) Standard Dose PEP

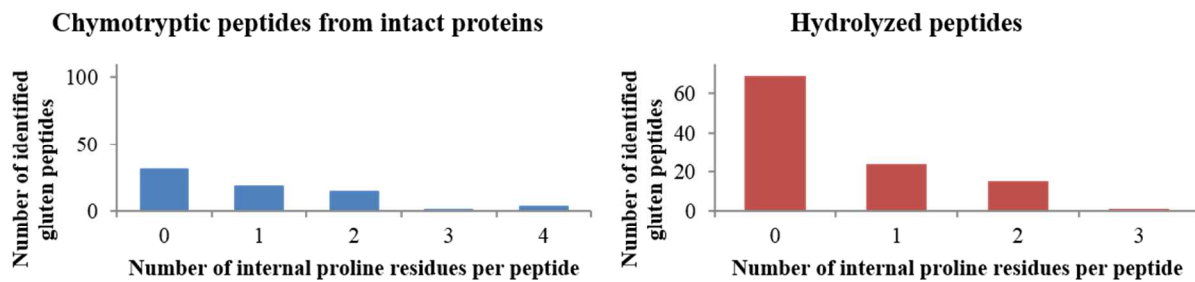

Supplementary Figure 5. MS1 peak areas for two chymotryptic peptides from  $\alpha/\beta$  gliadin, RPQQYPQPQPQY (A) and LQLQFPQPQLPY (B), which were used to determine the percent intact gluten in Figure 3. Samples are labeled as before or after fermentation by brew replicate 1-4. The data shown is before normalization to isotopically labeled versions.

#### A) RPQQYPQPQPQY

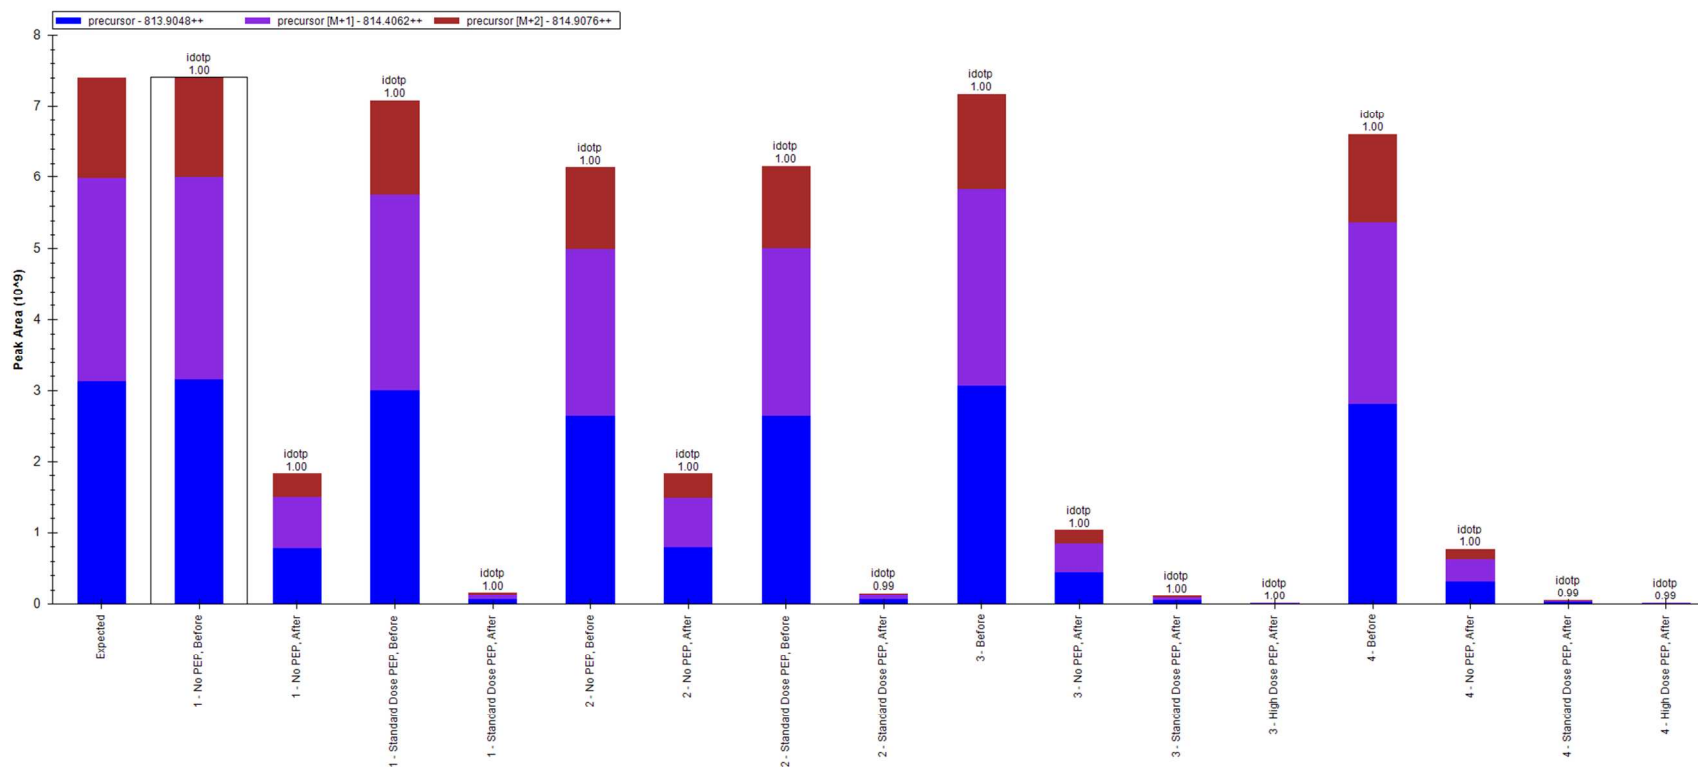

## B) LQLQPFPPQLPY

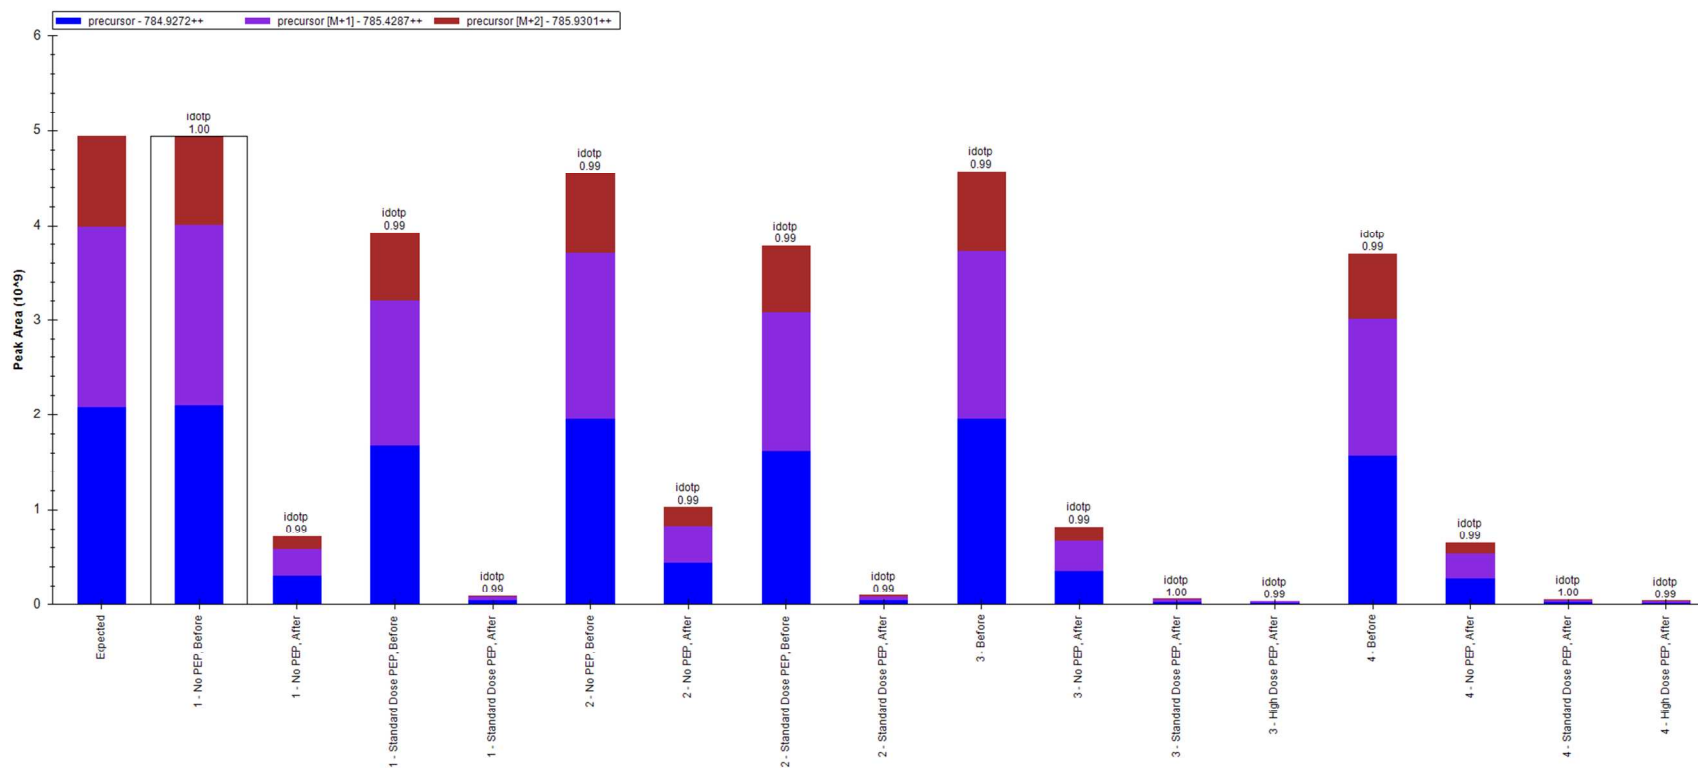

Supplementary Figure 6. Gluten peptides identified in the non-PEP containing beer, beer brewed with the standard dose of PEP, and beer brewed with the high dose of PEP that contain known immunogenic sequences, according to their associated gluten protein class.

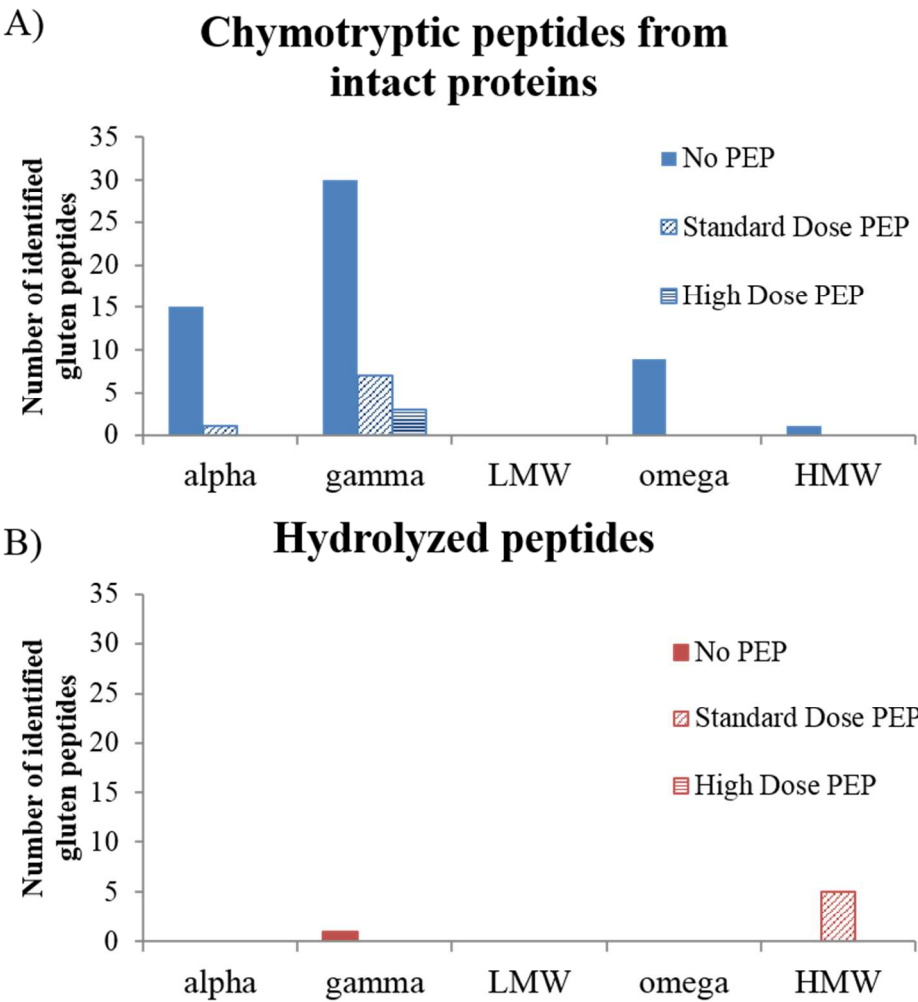

Supplementary Figure 7. Total number of gluten peptides identified in the non-PEP containing 200 mg/L wheat gluten incurred sorghum beer and four non-PEP containing commercial wheat beers.

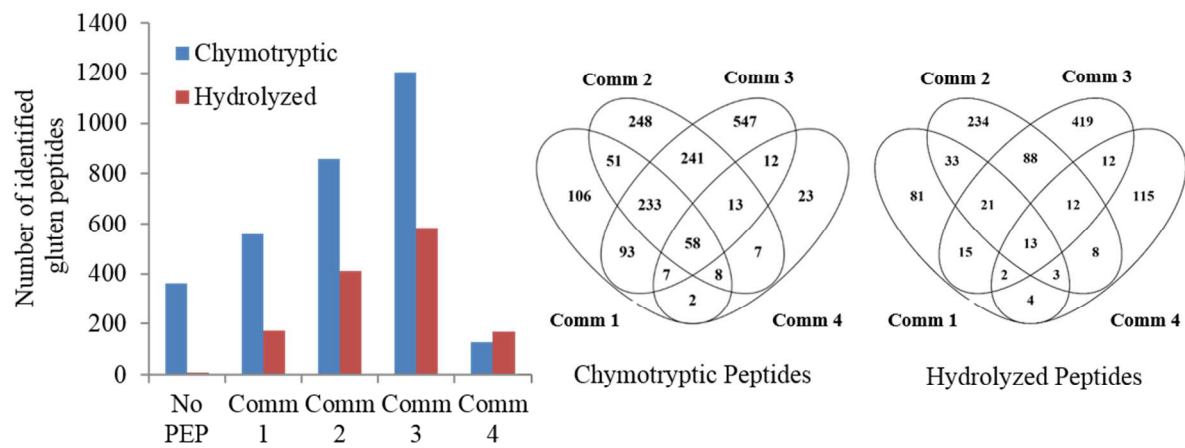

Supplement: Supplementary file 1 [file 10307409]
